# Supplementary material for: Supramolecular cations of the m-fluoroanilinium(dibenzo[18]crown-6) in ferromagnetic salt
Source: Royal Society of Chemistry journal article supplement (doi:10.1039/c0dt01140a), 2011-01-01
Supplement: c0dt01140a.pdf [file c0dt01140a.pdf]

**Supporting Information.**

**Supramolecular cations of the *m*-fluoroanilinium(dibenzo[18]crown-6)  
in ferromagnetic salt**

**Toru Endo,<sup>a</sup> Tomoyuki Akutagawa<sup>\*c</sup>, Shin-ichiro Noro<sup>a,b</sup>**

**and Takayoshi Nakamura<sup>\*a,b</sup>**

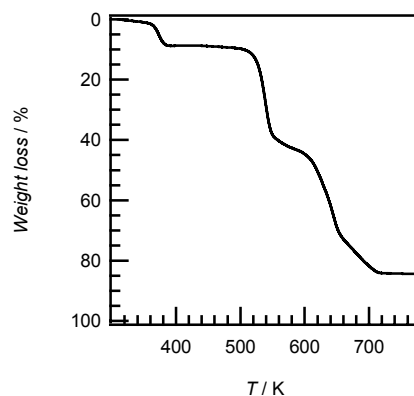

**Fig. S1** Thermogravimetry analysis of salt **1**. Thermal analysis station using an  $\text{Al}_2\text{O}_3$  reference in the temperature range from 298 to 773 K with a heating rate of  $10 \text{ K min}^{-1}$  under nitrogen. The existence of one  $\text{CH}_3\text{OH}$  and  $\text{CH}_3\text{CN}$  in salt **1** was confirmed by the weight-loss of 8.7 % at 450 K in the thermogravimetry measurement. Since the weight loss of the salt began already at room temperature and both of the  $\text{CH}_3\text{OH}$  and  $\text{CH}_3\text{CN}$  molecules were gradually removed from the salt. The decomposition of the salt was observed at 520 K.

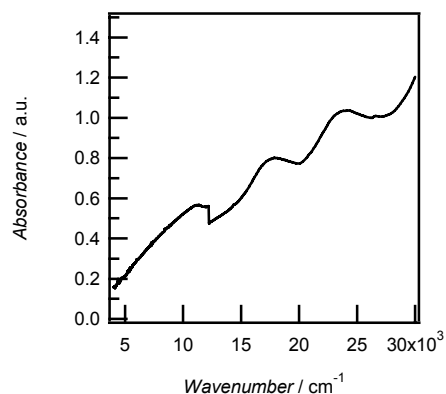

**Fig. S2** UV - vis - NIR - IR spectrum (KBr pellet) of **1**. Absorption bands due to Cr<sup>III</sup> appeared at around  $10.6 \times 10^3$ ,  $17.5 \times 10^3$  and  $23.4 \times 10^3$  cm<sup>-1</sup>.

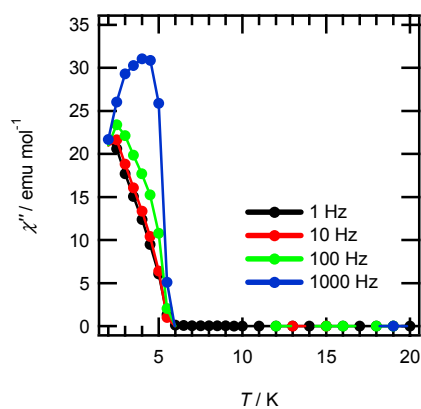

**Fig. S3** Magnetic properties of **1**. The out-phase signal in the AC susceptibility measurements was measured at temperatures between 2 to 20 K in an applied AC field of  $\pm 3$  Oe at frequencies of 1, 10, 100, and 1000 Hz. The out-of-phase signal becoming nonzero at 5.5 K, which defines  $T_c$  for this material.
